# Supplementary material for: An Open-Label, Phase II Study of the Safety of Pirfenidone in Patients with Idiopathic Pulmonary Fibrosis (PIPF-002)
Source: PubMed Central journal article supplement (PMC6967037; doi:10.1007/s41030-018-0053-y), 2018-06-01
Supplement: 41030_2018_53_MOESM1_ESM.pdf [file 41030_2018_53_MOESM1_ESM.pdf]

**An Open-Label, Phase II Study of the Safety of Pirfenidone in Patients with Idiopathic Pulmonary Fibrosis (PIPF-002)**

**SUPPLEMENTARY MATERIAL**

This supplement contains 3 tables.

**Table S1.** Dose titration and dosing by enrollment group

| <b>Patient enrollment group<sup>a</sup></b> | <b>Pirfenidone dose (as tolerated)<sup>b</sup></b>                                                                                                          | <b>Initial dose titration</b>                                                                                                                                                                                                                              |
|---------------------------------------------|-------------------------------------------------------------------------------------------------------------------------------------------------------------|------------------------------------------------------------------------------------------------------------------------------------------------------------------------------------------------------------------------------------------------------------|
| Group 1<br>( <i>n</i> = 4)                  | Started study treatment at prior dose (maximum, 3600 mg/day)                                                                                                | <ul style="list-style-type: none"> <li>• Not required</li> </ul>                                                                                                                                                                                           |
| Group 2<br>( <i>n</i> = 37)                 | Target maintenance dose: <ul style="list-style-type: none"> <li>• 40 mg/kg (maximum, 3600 mg/day)</li> </ul>                                                | <ul style="list-style-type: none"> <li>• Dose was titrated over 10 to 14 days to target maintenance dose, based on body weight and tolerability</li> </ul>                                                                                                 |
| Group 3<br>( <i>n</i> = 42)                 | Target maintenance dose: <ul style="list-style-type: none"> <li>• With 400-mg capsules, 2400 mg/day</li> <li>• With 267-mg capsules, 2403 mg/day</li> </ul> | <ul style="list-style-type: none"> <li>• With 400-mg capsules, dose was titrated over 10 days to target maintenance dose, as tolerated</li> <li>• With 267-mg capsules, dose was titrated over 15 days to target maintenance dose, as tolerated</li> </ul> |

<sup>a</sup> Patients in group 1 were receiving pirfenidone at enrollment or had received their last dose  $\leq$  4 weeks before enrollment. Patients in group 2 had no previous exposure to pirfenidone or received their last dose  $>$  4 weeks before enrollment. Patients in group 3 had no previous exposure to pirfenidone and enrolled after implementation of protocol Amendment 2.

<sup>b</sup> With the implementation of Amendment 3, patients were transitioned from 400-mg to 267-mg capsules, and the dose was adjusted to be as close as possible to the previous dose without exceeding the maximum permitted dose. Patients whose maintenance dose was  $>$  2403 mg/day ( $\leq$  3600 mg/day) continued to receive that dose.

**Table S2.** Enrollment by patient source, all treated patients

| Patients by enrollment source, <i>n</i> <sup>a</sup> | Patient enrollment groups <sup>b</sup> |                             |                             | All patients<br>( <i>N</i> = 83) |
|------------------------------------------------------|----------------------------------------|-----------------------------|-----------------------------|----------------------------------|
|                                                      | Group 1<br>( <i>n</i> = 4)             | Group 2<br>( <i>n</i> = 37) | Group 3<br>( <i>n</i> = 42) |                                  |
| Study PIPF-001                                       | 1                                      | 9                           | 0                           | 10                               |
| Prior pirfenidone                                    | 1                                      | 6                           | 0                           | 7                                |
| Marnac-sponsored IPP                                 | 3                                      | 0                           | 0                           | 3                                |
| Prior pirfenidone                                    | 3                                      | 0                           | 0                           | 3                                |
| Investigator-sponsored IND                           | 0                                      | 0                           | 0                           | 0                                |
| Early access program                                 | 0                                      | 28                          | 42                          | 70                               |

IND, investigational new drug; IPP, individual patient protocol.

<sup>a</sup> Study PIPF-001 was originally sponsored by Marnac and completed by InterMune. Several IPPs were initiated under Marnac sponsorship. InterMune was acquired by F. Hoffmann-La Roche in 2014.

<sup>b</sup> Patients in group 1 were receiving pirfenidone at enrollment or had received their last dose  $\leq$  4 weeks before enrollment. Patients in group 2 had no previous exposure to pirfenidone or received their last dose  $>$  4 weeks before enrollment. Patients in group 3 had no previous exposure to pirfenidone and enrolled after implementation of protocol Amendment 2.

**Table S3.** TEAEs occurring in  $\geq 5\%$  of patients

| Patients with $\geq 1$ TEAE by preferred term, <i>n</i> (%) | Pirfenidone $\leq 2403$ mg/day ( <i>n</i> = 52) <sup>a</sup> | Pirfenidone $> 2403$ mg/day ( <i>n</i> = 31) <sup>a</sup> | All patients ( <i>N</i> = 83) |
|-------------------------------------------------------------|--------------------------------------------------------------|-----------------------------------------------------------|-------------------------------|
| <b>All TEAEs</b>                                            | <b>52 (100.0)</b>                                            | <b>30 (96.8)</b>                                          | <b>82 (98.8)</b>              |
| Nausea                                                      | 25 (48.1)                                                    | 15 (48.4)                                                 | 40 (48.2)                     |
| IPF                                                         | 18 (34.6)                                                    | 11 (35.5)                                                 | 29 (34.9)                     |
| Fatigue                                                     | 15 (28.8)                                                    | 12 (38.7)                                                 | 27 (32.5)                     |
| Dyspnea                                                     | 18 (34.6)                                                    | 7 (22.6)                                                  | 25 (30.1)                     |
| Upper respiratory tract infection                           | 13 (25.0)                                                    | 8 (25.8)                                                  | 21 (25.3)                     |
| Cough                                                       | 11 (21.2)                                                    | 10 (32.3)                                                 | 21 (25.3)                     |
| Weight decreased                                            | 11 (21.2)                                                    | 7 (22.6)                                                  | 18 (21.7)                     |
| Rash                                                        | 7 (13.5)                                                     | 9 (29.0)                                                  | 16 (19.3)                     |
| Insomnia                                                    | 11 (21.2)                                                    | 4 (12.9)                                                  | 15 (18.1)                     |
| Headache                                                    | 7 (13.5)                                                     | 7 (22.6)                                                  | 14 (16.9)                     |
| Appetite decreased                                          | 8 (15.4)                                                     | 6 (19.4)                                                  | 14 (16.9)                     |
| Vomiting                                                    | 10 (19.2)                                                    | 3 (9.7)                                                   | 13 (15.7)                     |
| Bronchitis                                                  | 9 (17.3)                                                     | 3 (9.7)                                                   | 12 (14.5)                     |
| Depression                                                  | 7 (13.5)                                                     | 5 (16.1)                                                  | 12 (14.5)                     |
| Dizziness                                                   | 10 (19.2)                                                    | 2 (6.5)                                                   | 12 (14.5)                     |
| Urinary tract infection                                     | 8 (15.4)                                                     | 3 (9.7)                                                   | 11 (13.3)                     |
| Sinusitis                                                   | 7 (13.5)                                                     | 4 (12.9)                                                  | 11 (13.3)                     |
| Anorexia                                                    | 8 (15.4)                                                     | 3 (9.7)                                                   | 11 (13.3)                     |
| Pneumonia                                                   | 6 (11.5)                                                     | 4 (12.9)                                                  | 10 (12.0)                     |
| Diarrhea                                                    | 6 (11.5)                                                     | 4 (12.9)                                                  | 10 (12.0)                     |
| Back pain                                                   | 7 (13.5)                                                     | 3 (9.7)                                                   | 10 (12.0)                     |
| Anxiety                                                     | 5 (9.6)                                                      | 5 (16.1)                                                  | 10 (12.0)                     |
| Constipation                                                | 7 (13.5)                                                     | 3 (9.7)                                                   | 10 (12.0)                     |
| Gastroesophageal reflux disease                             | 5 (9.6)                                                      | 5 (16.1)                                                  | 10 (12.0)                     |
| Pulmonary hypertension                                      | 8 (15.4)                                                     | 2 (6.5)                                                   | 10 (12.0)                     |
| Peripheral edema                                            | 4 (7.7)                                                      | 5 (16.1)                                                  | 9 (10.8)                      |
| Asthenia                                                    | 7 (13.5)                                                     | 1 (3.2)                                                   | 8 (9.6)                       |
| Hypertension                                                | 6 (11.5)                                                     | 2 (6.5)                                                   | 8 (9.6)                       |
| Nasal congestion                                            | 5 (9.6)                                                      | 3 (9.7)                                                   | 8 (9.6)                       |
| Nasopharyngitis                                             | 5 (9.6)                                                      | 3 (9.7)                                                   | 8 (9.6)                       |
| Abdominal discomfort                                        | 6 (11.5)                                                     | 1 (3.2)                                                   | 7 (8.4)                       |
| Dyspepsia                                                   | 5 (9.6)                                                      | 2 (6.5)                                                   | 7 (8.4)                       |
| Pyrexia                                                     | 5 (9.6)                                                      | 2 (6.5)                                                   | 7 (8.4)                       |
| Anemia                                                      | 3 (5.8)                                                      | 3 (9.7)                                                   | 6 (7.2)                       |
| Contusion                                                   | 6 (11.5)                                                     | 0                                                         | 6 (7.2)                       |
| Myalgia                                                     | 5 (9.6)                                                      | 1 (3.2)                                                   | 6 (7.2)                       |
| Photosensitivity reaction                                   | 1 (1.9)                                                      | 5 (16.1)                                                  | 6 (7.2)                       |
| Respiratory failure                                         | 5 (9.6)                                                      | 1 (3.2)                                                   | 6 (7.2)                       |
| Respiratory tract infection                                 | 4 (7.7)                                                      | 2 (6.5)                                                   | 6 (7.2)                       |
| Skin laceration                                             | 5 (9.6)                                                      | 1 (3.2)                                                   | 6 (7.2)                       |
| Coronary artery disease                                     | 3 (5.8)                                                      | 2 (6.5)                                                   | 5 (6.0)                       |
| Proteinuria                                                 | 4 (7.7)                                                      | 1 (3.2)                                                   | 5 (6.0)                       |
| Pruritus                                                    | 1 (1.9)                                                      | 4 (12.9)                                                  | 5 (6.0)                       |
| Stomach discomfort                                          | 4 (7.7)                                                      | 1 (3.2)                                                   | 5 (6.0)                       |

IPF, idiopathic pulmonary fibrosis; TEAE, treatment-emergent adverse event.

<sup>a</sup> Patients were categorized by maximum daily dose received at any time ( $\geq 1$  prescribed dose  $> 2403$  mg/day or all doses  $\leq 2403$  mg/day).
